**Title:** *In vivo* emergence of high-level resistance during treatment reveals the first identified mechanism of amphotericin B resistance in *Candida auris*

**Keywords:** *Candida auris*, amphotericin B, resistance, *ERG6*, *in vivo* evolution

**Running Title:** Mutations in *Candida auris* *ERG6* confer amphotericin B resistance

**Authors:** Jeffrey M. Rybak<sup>a, \*</sup>, Katherine S. Barker<sup>a</sup>, José F. Muñoz<sup>b</sup>, Josie E. Parker<sup>c</sup>, Suhail Ahmad<sup>d</sup>, Eiman Mokaddas<sup>d,e</sup>, Aneesa Abdullah<sup>e</sup>, Rehab S. Elhagracy<sup>f</sup>, Steve L. Kelly<sup>c</sup>, Christina A. Cuomo<sup>b</sup>, P. David Rogers<sup>a, \*</sup>

<sup>a</sup> Department of Pharmacy and Pharmaceutical Sciences, St. Jude Children's Research Hospital, Memphis, Tennessee, USA

<sup>b</sup> Broad Institute of MIT and Harvard, Cambridge, MA, USA

<sup>c</sup> Centre for Cytochrome P450 Biodiversity, Institute of Life Science, Swansea University Medical School, Swansea, UK

<sup>d</sup> Department of Microbiology, Faculty of Medicine, Kuwait University, Jabriya, Kuwait

<sup>e</sup> Department of Microbiology, Ibn Sina Hospital, Shuwaikh, Kuwait

<sup>f</sup> Department of Hematology, Kuwait Cancer Control Center, Shuwaikh, Kuwait

\*Corresponding Authors:

P. David Rogers, Pharm.D., Ph.D.

Member and Chair  
Endowed Chair in Pharmaceutical Sciences  
Department of Pharmacy and  
Pharmaceutical Sciences  
St. Jude Children's Research Hospital  
262 Danny Thomas Place, Mail Stop 313  
Memphis, TN 38105  
dave.rogers@stjude.org  
t. 901.595.7516  
f. 901.595.3125

Jeffrey M. Rybak, Pharm.D., Ph.D.

Instructor  
Department of Pharmacy  
and Pharmaceutical Sciences  
St. Jude Children's Research Hospital  
262 Danny Thomas Place, Mail Stop 313  
Memphis, TN 38105  
jrybak@stjude.org  
t. 901.595.2368  
f. 901.595.3125

1 **ABSTRACT**

2 *Candida auris* has emerged as a healthcare-associated and multidrug-resistant fungal  
3 pathogen of great clinical concern. While as much as 50% of *C. auris* clinical isolates  
4 are reported to be resistant to amphotericin B, to date, no mechanisms contributing to  
5 this resistance have been identified. We report here mutations in the *C. auris* sterol-  
6 methyltransferase gene, *ERG6*, as the first identified mechanism of amphotericin B  
7 resistance in this emerging pathogen and describe the clinical case in which this high-  
8 level amphotericin B resistance was acquired *in vivo* during therapy. Whole genome  
9 sequencing revealed the four *C. auris* isolates obtained from this single patient case to  
10 be genetically related and identified a mutation in *ERG6* as being associated with  
11 amphotericin B resistance. Cas9-mediated genetic manipulations confirmed this  
12 mutation alone to confer a >32-fold increase in amphotericin B resistance, and  
13 comprehensive sterol profiling revealed an abrogation of ergosterol biosynthesis and a  
14 corresponding accumulation of cholesta-type sterols in isolates and strains harboring  
15 the clinically derived *ERG6* mutation. Together these findings represent the first  
16 significant step forward in the understanding of clinical amphotericin B resistance in *C.*  
17 *auris*.

## 18 INTRODUCTION

19 In little over a decade, *Candida auris* has transformed from a newly identified  
20 species of *Candida* originally associated with infections of the auditory canal, to being  
21 recognized by the Centers for Disease Control and Prevention (CDC) as the first fungal  
22 pathogen to represent an urgent level of threat to public health.[1-4] Recently found to  
23 be the cause of outbreaks of invasive candidiasis on multiple continents and having  
24 been isolated from patients in more than 45 countries, *C. auris* readily colonizes  
25 patients and disseminates easily within healthcare facilities, changing the paradigm of  
26 healthcare-associated fungal infections.[4, 5] Moreover, *C. auris* frequently exhibits  
27 reduced susceptibility to multiple agents of the already limited antifungal  
28 armamentarium.[1, 4, 6] While limited epidemiological and clinical outcomes data  
29 currently preclude the establishment of true clinical breakpoints for the assessment of  
30 *C. auris* antifungal susceptibility, the CDC has defined tentative antifungal breakpoints  
31 using susceptibility data from hundreds of clinical *C. auris* isolates and available  
32 pharmacokinetic-pharmacodynamic data. Applying these tentative breakpoints, more  
33 than 90% of *C. auris* isolates are resistant to fluconazole (modal minimum inhibitory  
34 concentration [MIC]  $\geq 256$  mg/L), 30 to 50% are resistant to amphotericin B, and  
35 approximately 5% are resistant to echinocandins.[4, 7] Unfortunately, *C. auris* has also  
36 demonstrated the capacity to rapidly acquire resistance to antifungals *in vivo*, leaving  
37 clinicians with no reliable option for the treatment of infections caused by this emerging  
38 public health threat.[8] While the fluconazole resistance frequently identified among  
39 clinical isolates of *C. auris* has previously been associated with mutations in both  
40 *ERG11* and *TAC1B*, and resistance to echinocandins has been associated with

41 mutations in *FKS1*, to date, no mechanisms contributing to clinical amphotericin B  
42 resistance have been identified in *C. auris*. [4, 6, 9-11]

43 We present here a case where a patient receiving treatment for a fluconazole-  
44 resistant *C. auris* infection subsequently acquired amphotericin B-resistant, and later  
45 echinocandin-resistant, disease following multiple courses of antifungal therapy.  
46 Leveraging the clinical isolates from this single case, whole genome sequencing,  
47 comprehensive sterol profiling, and Cas9-mediated genetic manipulations, we have  
48 identified the first known mechanism of clinical amphotericin B resistance in *C. auris*  
49 conferred by mutations in the sterol-methyltransferase gene, *ERG6*. Furthermore, we  
50 show that the observed mutations in *ERG6* result in abolished biosynthesis of  
51 ergosterol, the target of amphotericin B, and these mutations alone abrogate the activity  
52 of this antifungal agent.

53

## 54 **MATERIALS AND METHODS**

55

56 **Isolate, strains, and growth media used in this study.** Isolation and species-specific  
57 identification of the four clinical *C. auris* strains isolated from the patient cases included  
58 in this study was performed as described elsewhere [12]. All laboratory-derived strains  
59 and clinical isolates are listed in Supplementary Table 1 and were grown in YPD liquid  
60 medium (1% yeast extract, 2% peptone, 2% dextrose) at 35°C in a shaking incubator  
61 unless otherwise indicated. Stocks of all strains and clinical isolates were prepared with  
62 50% sterile glycerol and were maintained at -80°C.

63

64 **Whole genome sequencing and variant identification.** Clinical isolates were cultured  
65 from glycerol stocks in YPD liquid media at 35 °C, and genomic DNA was extracted as  
66 previously described [13]. Genomic libraries were constructed and barcoded using the  
67 NEBNext Ultra DNA Library Prep kit (New England Biolabs, Ipswich, MA, USA) per  
68 manufacturer's instructions. Genomic libraries were sequenced using the Illumina HiSeq  
69 2500 platform with the HiSeq Rapid SBS Kit v2 as previously described [14]. Read  
70 quality and filtering was performed using FastQC v0.11.5 and PRINSEQ v0.20.3  
71 (21278185) using "-trim\_left 15 -trim\_qual\_left 20 -trim\_qual\_right 20 -min\_len 100 -  
72 min\_qual\_mean 25 -derep 14". Then, paired-end reads were aligned to the *C. auris*  
73 assembly strain B8441 (GenBank accession PEKT00000000.2; (30559369)) using  
74 BWA mem v0.7.12 (19451168) and variants were identified using GATK v3.7  
75 (20644199) with the haploid mode and GATK tools (RealignerTargetCreator,  
76 IndelRealigner, HaplotypeCaller for both SNPs and indels, CombineGVCFs,  
77 GenotypeGVCFs, GatherVCFs, SelectVariants, and Variant Filtration). Sites were  
78 filtered with Variant Filtration using "QD < 2.0 || FS > 60.0 || MQ < 40.0". Genotypes  
79 were filtered if the minimum genotype quality < 50, percent alternate allele < 0.8, or  
80 depth < 10 ([https://github.com/broadinstitute/broad-](https://github.com/broadinstitute/broad-fungalgroup/blob/master/scripts/SNPs/filterGatkGenotypes.py)  
81 [fungalgroup/blob/master/scripts/SNPs/filterGatkGenotypes.py](https://github.com/broadinstitute/broad-fungalgroup/blob/master/scripts/SNPs/filterGatkGenotypes.py)). Genomic variants were  
82 annotated, and the functional effect was predicted using SnpEff v4.3T (22728672).

83

84 **Plasmid construction and repair template preparation.** CRISPR-Cas9-mediated  
85 gene editing was performed using the transient episomal plasmid-based system

86 described previously and the plasmid pJMR17v3 [15, 16]. Guide DNAs used as inserts  
87 in pJMR17v3 and DNA primers used in repair template generation are listed in Table 2.

88

89 **Strain construction.** Electrocompetent cells were prepared as previously described  
90 [10] and were mixed in an electroporation cuvette with ~10 µg appropriate repair  
91 template DNA (containing the desired/introduced *ERG6* sequence) and ~10 µg  
92 appropriate plasmid (cloned with the guide DNA matching the *ERG6* sequence of the  
93 isolate being electroporated) prior to electroporation with a BioRad GenePulser  
94 (BioRad, Hercules, CA). One milliliter 1M sorbitol was used to transfer transformation  
95 mixtures from the cuvette to a culture tube containing 1mL YPD, and transformants  
96 were allowed to recover for 4-6h at 35°C with shaking. Aliquots of the recovered  
97 transformants were spread on YPD agar plates supplemented with 200 µg/ml  
98 nourseothricin (Nou200) and incubated at 35°C until colonies formed. Single colonies  
99 were picked from transformation plates and patched sequentially on YPD agar. Once  
100 the *ERG6* sequence was verified by Sanger sequencing, desired colonies were cultured  
101 in 2mL YPD overnight at 35°C and subsequently streaked for single colonies on YPD  
102 agar. Colonies were then replica plated on both YPD agar and Nou200 to confirm  
103 nourseothricin susceptibility due loss of the pJMR17v3 plasmid.

104

105 **Sanger sequencing.** Genomic DNA was isolated from colonies with the appropriate  
106 growth phenotype and was used to amplify the *ERG6* ORF in PCR with primers  
107 CAU0013J01m and CAU0014J01m (Table 2) and Phusion Green master mix per  
108 manufacturer's instructions (Thermo Scientific, Waltham, MA). PCR amplicons were

109 then used as templates in Sanger sequencing reactions primed with sequencing  
110 primers (Supplementary Table 2) and run on an 3730xl DNA Analyzer (Applied  
111 Biosystem, Foster City, CA) using standard DNA sequencing chemistries.

112

113 **Comprehensive sterol profiling.** Laboratory-derived strains and the parental clinical  
114 isolates were grown to the exponential-growth phase at 35°C in RPMI liquid medium.  
115 Alcoholic KOH was used to extract nonsaponifiable lipids. A vacuum centrifuge (Heto)  
116 was used to dry samples, which were then derivatized by adding 100 µl 90% N,O-  
117 bis(trimethylsilyl)-trifluoroacetamide-10% tetramethylsilane (TMS) (Sigma, St. Louis,  
118 MO) and 200 µl anhydrous pyridine (Sigma) while heating at 80°C for 2h as previously  
119 described [10, 17]. Gas chromatography-mass spectroscopy (GC-MS) (with a Thermo  
120 1300 gas chromatography system coupled to a Thermo ISQ mass spectrometer  
121 (Thermo Scientific) was used to analyze and identify TMS-derivatized sterols through  
122 comparison of the retention times and fragmentation spectra for known standards.  
123 Sterol profiles for each sample were determined by analyzing the integrated peak areas  
124 from GC-MS data files using Xcalibur software (Thermo Scientific). All sterol analysis  
125 was performed in biological triplicate. Error bars for each data point represent the  
126 standard deviations of results from three independent measurements of technical  
127 replicates.

128

129 **MICs by Elipsometer test (E-test).** E-tests were performed to determine amphotericin  
130 B MICs as per manufacturer's instructions (Biomerieux USA, Chicago, IL) with

131 modifications as recommended by the Clinical Laboratory Standards Institute. All  
132 susceptibility testing was performed in biological duplicate.

133

## 134 **RESULTS**

135

### 136 ***Patient case and antifungal susceptibility testing of clinical C. auris isolates.***

137 A 33-year old female receiving treatment for Hodgkin's lymphoma and advanced stage  
138 nodular sclerosis was admitted to the hospital after complaints of respiratory distress. A  
139 high-resolution chest CT revealed bilateral diffuse alveolar disease, ground glass  
140 opacities, and mild right-sided pneumothorax. The patient was empirically initiated on  
141 broad spectrum antimicrobials including meropenem, linezolid, and liposomal  
142 amphotericin B (dosed at 5mg/kg) (**Figure 1**). Both bronchoalveolar lavage fluid and  
143 endotracheal tube cultures would subsequently grow *C. albicans*, and liposomal  
144 amphotericin B was continued for a total of 3 weeks. The patient's condition improved,  
145 and chemotherapy was resumed approximately one month after the completion of  
146 amphotericin B therapy.

147         Subsequently, the patient developed dyspnea and alveolar hemorrhage and  
148 treatment with meropenem and methylprednisolone was initiated. Cultures of  
149 endotracheal tube (ETT) secretions grew yeast (Isolate 1) initially identified as *Candida*  
150 *famata* by Vitek2, but later revealed to be *C. auris* by internal transcribed spacers (ITS)  
151 sequencing. When applying the tentative CDC *C. auris* breakpoints, Isolate 1 was  
152 resistant to fluconazole but susceptible to caspofungin and amphotericin B. A 2-week  
153 course of caspofungin treatment was initiated, to be followed by a 2-week course of



154 liposomal amphotericin B (5mg/kg/day) when ETT cultures remained positive. Following  
155 this course of amphotericin B, all respiratory cultures remained negative for *C. auris*,  
156 however the patient remained on broad spectrum antibiotics including piperacillin-  
157 tazobactam, amikacin, and colistin for a complicated course of treatment for a  
158 carbapenem-resistant *Pseudomonas aeruginosa* respiratory tract infection.

159         One month later, the patient developed a urinary tract infection and cultures grew  
160 yeast initially identified as *Candida haemulonii*, but later confirmed as *C. auris* by ITS  
161 sequencing (Isolate 2). Isolate 2 was highly resistant to both fluconazole and  
162 amphotericin B but remained susceptible to caspofungin (**Table 1**), and a 2-week  
163 course of caspofungin was initiated. After the completion of caspofungin treatment,  
164 urine cultures again grew *C. auris* (Isolate 3), and a 3-week course of liposomal  
165 amphotericin B (5 mg/kg/day) was initiated. Ten days into this course of amphotericin B,  
166 urine cultures again grew *C. auris* (Isolate 4). Intriguingly, while Isolate 4 was resistant  
167 to both fluconazole and caspofungin, it had regained susceptibility to amphotericin B  
168 (**Table 1**). Shortly after the completion of amphotericin B therapy, the patient was  
169 transferred to another medical facility for further treatment and was lost to follow-up.

170

### 171 ***Whole genome sequencing.***

172         Whole genome sequencing was performed as previously described on the four  
173 isolates and revealed all isolates to belong to Clade I (subclade b), with four or fewer  
174 single-nucleotide polymorphisms or insertions/deletions (indels) separating any two  
175 isolates, consistent with all isolates being genetically related (**Table 2**).[11] All isolates  
176 were found to have mutations previously associated with fluconazole resistance in the

177 *ERG11* and *TAC1B* genes, encoding the Y132F and A583S amino acid substitutions,  
178 respectively. The two isolates exhibiting high-level (MIC >32mg/L) amphotericin B  
179 resistance, Isolates 2 and 3, were both found to have an indel mutation in the sterol-  
180 methyltransferase gene, *ERG6*, resulting in an early stop codon and likely nonsense  
181 transcript (YY98V\*). Intriguingly, the terminal amphotericin B-susceptible isolate, Isolate  
182 4, was found to retain this indel mutation in *ERG6*, but have also acquired a duplication  
183 of two nucleotides, resulting in a full length *ERG6* transcript with 3 altered amino acid  
184 residues (encoding RYY97LVS). Isolate 4 was also found to have a novel mutation  
185 (encoding D642Y) in hot-spot 1 of the gene encoding  $\beta$ -D-glucan synthase, *FKS1*.  
186

#### 187 ***Impact of ERG6 mutations on Amphotericin B susceptibility.***

188 To test the influence of the identified mutations in *C. auris* *ERG6* on amphotericin B  
189 susceptibility, a transient Cas9-mediated *C. auris* genetic manipulation system was  
190 used to perform allelic exchange. Transformations were performed by electroporation,  
191 two independent transformants were obtained for each allele exchange, and all  
192 transformants were confirmed by Sanger sequencing as previously described [10, 11].  
193 Introduction of the YY98V\* encoding indel mutation into the *ERG6* gene of Isolates 1  
194 and 4 resulted in a  $\geq 32$ -fold increase in amphotericin B MIC in both backgrounds  
195 (**Figure 2**) and no difference was observed between biological replicate transformants  
196 (data not shown). Conversely, introduction of the wildtype (matching the antifungal  
197 susceptible B8441 reference sequence) *ERG6* sequence into both Isolates 2 and 3  
198 resulted in a complete restoration of amphotericin susceptibility ( $\geq 32$ -fold reduction in  
199 MIC), confirming the role of this mutation in the high-level resistance observed.

200

201 ***Comprehensive sterol profiling.***

202         As amphotericin B is known to exert an antifungal effect by directly binding to the  
203 predominant sterol of most medically relevant fungi, ergosterol, and the YY98V\*  
204 encoding mutation in *ERG6* was hypothesized to result in an abrogation of sterol-  
205 methyltransferase activity, we next performed comprehensive sterol profiling to  
206 investigate changes in cellular sterol composition using methods as previously  
207 described [11]. Consistent with previously reported *C. auris* cell sterol compositions, all  
208 amphotericin B-susceptible isolates and strains were observed to have ergosterol as the  
209 predominant sterol (>60%), with ergosta-type sterols (such as ergosta-5,7-dienol and  
210 ergosta-5,8,22,24(28)-tetraenol), and early sterols (such as lanosterol and zymosterol)  
211 comprising the majority of remaining sterols (**Figure 3**). Conversely, all isolates and  
212 strains with the amphotericin B resistance-conferring YY98V\* mutation in *ERG6* were  
213 found to have sterol profiles completely devoid of ergosta-type sterols. Instead,  
214 cholesta-5,7,24-trienol was found to be the most abundant sterol (>60%) in these  
215 samples, with the remainder of sterols being comprised of other cholesta-type sterols  
216 (such as cholesta-5,8,22,24-tetraenol and cholesta-7,24-dienol) and early sterols. Thus,  
217 the observed resistance to amphotericin B correlates directly with the abrogation of the  
218 production of ergosterol observed.

219

220 **DISCUSSION**

221         The patient case presented here exemplifies the challenges antifungal resistance  
222 poses to clinicians treating patients with *C. auris* infections, and for the first time

223 identifies mutations in the *C. auris* sterol-methyltransferase gene, *ERG6*, as a  
224 mechanism conferring high-level amphotericin B resistance. These findings were  
225 supported by allelic replacement studies. The *ERG6* mutations described here resulted  
226 in a dramatic shift in *C. auris* cell sterol profiles, diverting sterol production toward  
227 cholesta-type sterols more similar to those found in mammalian cell membranes.  
228 Intriguingly, while we have previously reported the combination of mutations in *Candida*  
229 *glabrata* *ERG2* and *ERG6* as being associated with both sterol profiles favoring  
230 cholesta-type sterols and increased amphotericin B resistance, the level of amphotericin  
231 B resistance observed in *C. glabrata* clinical isolates was significantly lower (MICs of 1  
232 to 4 mg/L) than that which we observed in the *C. auris* clinical isolates in these studies  
233 (MIC >32 mg/L)[18]. It remains to be seen whether this stark difference in the magnitude  
234 of amphotericin B resistance is due to differences in other cell membrane lipids or  
235 corresponds to how these distantly related species of *Candida* respond to the stress  
236 induced by amphotericin B. Further research is needed to determine the prevalence of  
237 *ERG6* mutations among amphotericin B-resistant clinical isolates of *C. auris*.

238

## 239 **NOTES**

240

241 **Disclaimer.** The funders had no role in study design, data collection and interpretation,  
242 or the decision to submit the work for publication.

243

244 **Financial support.** This work was supported through the Society of Infectious Diseases  
245 Pharmacists Young Investigator Research Award granted to J.M.R., and NIH grant R01

246 A1058145 awarded to P.D.R.. C.A.C. and J.F.M. were supported by NIAID award  
247 U19AI110818 to the Broad Institute. C.A.C. is a CIFAR fellow in the Fungal Kingdom  
248 Program.

249

250 **Potential conflicts of interest.** All authors: No reported conflicts. All authors have  
251 submitted the ICMJE Form for Disclosure of Potential Conflicts of Interest. Conflicts that  
252 the editors consider relevant to the content of the manuscript have been disclosed.

253

254 **Institutional review board statement:** The clinical samples were obtained after  
255 obtaining verbal consent only as part of routine patient care and diagnostic work-up for  
256 the isolation and susceptibility testing of bacterial and fungal pathogens. The study was  
257 approved by the Health Sciences Center Ethical Committee, Kuwait University  
258 (approval letter VDR/EC/3724).

259

260 **Informed consent statement:** The need for informed consent was waived by the  
261 Health Sciences Center Ethical Committee, Kuwait University as the results are  
262 reported on deidentified samples without revealing patient identity.

263

264 **Author Contributions:** JMR, KSB, JFM, JEP, SLK, CAC, and PDR contributed to the  
265 conception of experimental designs and methodological development. SA, EM, AA, and  
266 RSE oversaw or contributed to the clinical and microbiological care of the patient  
267 described in this work. JMR, KSB, JFM, JEP, SA, EM, AA, and CAC performed  
268 experiments and analyzed data. JMR, SA, SLK, CAC, and PDR oversaw and the

269 planning and execution of these studies. JMR, SLK, CAC, and PDR contributed to the  
270 financial support of this work. All authors wrote, reviewed, and approved the manuscript.  
271  
272

## 273 REFERENCES

- 274 [1] S.R. Lockhart, K.A. Etienne, S. Vallabhaneni, J. Farooqi, A. Chowdhary, N.P. Govender, A.L.  
275 Colombo, B. Calvo, C.A. Cuomo, C.A. Desjardins, E.L. Berkow, M. Castanheira, R.E. Magobo, K.  
276 Jabeen, R.J. Asghar, J.F. Meis, B. Jackson, T. Chiller, A.P. Litvintseva, Simultaneous Emergence of  
277 Multidrug-Resistant *Candida auris* on 3 Continents Confirmed by Whole-Genome Sequencing  
278 and Epidemiological Analyses, *Clin Infect Dis* 64(2) (2017) 134-140.
- 279 [2] Anonymous, CDC's Antibiotic Resistance Threats in the United States  
280 <https://www.cdc.gov/drugresistance/pdf/threats-report/2019-ar-threats-report-508.pdf>  
281 (2019).
- 282 [3] K. Satoh, K. Makimura, Y. Hasumi, Y. Nishiyama, K. Uchida, H. Yamaguchi, *Candida auris* sp.  
283 nov., a novel ascomycetous yeast isolated from the external ear canal of an inpatient in a  
284 Japanese hospital, *Microbiol Immunol* 53(1) (2009) 41-4.
- 285 [4] S. Ahmad, W. Alfouzan, *Candida auris*: Epidemiology, Diagnosis, Pathogenesis, Antifungal  
286 Susceptibility, and Infection Control Measures to Combat the Spread of Infections in Healthcare  
287 Facilities, *Microorganisms* 9(4) (2021).
- 288 [5] D.J. Sexton, M.L. Bentz, R.M. Welsh, G. Derado, W. Furin, L.J. Rose, J. Noble-Wang, M. Pacilli,  
289 T.D. McPherson, S. Black, S.K. Kembler, O. Herzegh, A. Ahmad, K. Forsberg, B. Jackson, A.P.  
290 Litvintseva, Positive correlation between *Candida auris* skin-colonization burden and  
291 environmental contamination at a ventilator-capable skilled nursing facility in Chicago, *Clin*  
292 *Infect Dis* (2021).
- 293 [6] A. Chowdhary, A. Prakash, C. Sharma, M. Kordalewska, A. Kumar, S. Sarma, B. Tarai, A.  
294 Singh, G. Upadhyaya, S. Upadhyay, P. Yadav, P.K. Singh, V. Khillan, N. Sachdeva, D.S. Perlin, J.F.  
295 Meis, A multicentre study of antifungal susceptibility patterns among 350 *Candida auris* isolates  
296 (2009-17) in India: role of the ERG11 and FKS1 genes in azole and echinocandin resistance, *J*  
297 *Antimicrob Chemother* 73(4) (2018) 891-899.
- 298 [7] Anonymous, *Candida auris*: antifungal susceptibility testing and interpretation, Centers for  
299 Disease Control and Prevention, Atlanta, GA. [https://www.cdc.gov/fungal/candida-auris/c-](https://www.cdc.gov/fungal/candida-auris/c-auris-antifungal.html)  
300 [auris-antifungal.html](https://www.cdc.gov/fungal/candida-auris/c-auris-antifungal.html) (2020).
- 301 [8] M.J. Biagi, N.P. Wiederhold, C. Gibas, B.L. Wickes, V. Lozano, S.C. Bleasdale, L. Danziger,  
302 Development of High-Level Echinocandin Resistance in a Patient With Recurrent *Candida auris*  
303 Candidemia Secondary to Chronic Candiduria, *Open Forum Infect Dis* 6(7) (2019) ofz262.
- 304 [9] K.R. Healey, M. Kordalewska, C. Jimenez Ortigosa, A. Singh, I. Berrio, A. Chowdhary, D.S.  
305 Perlin, Limited ERG11 Mutations Identified in Isolates of *Candida auris* Directly Contribute to  
306 Reduced Azole Susceptibility, *Antimicrob Agents Chemother* 62(10) (2018).
- 307 [10] J.M. Rybak, L.A. Doorley, A.T. Nishimoto, K.S. Barker, G.E. Palmer, P.D. Rogers, Abrogation  
308 of Triazole Resistance upon Deletion of CDR1 in a Clinical Isolate of *Candida auris*, *Antimicrob*  
309 *Agents Chemother* 63(4) (2019).
- 310 [11] J.M. Rybak, J.F. Munoz, K.S. Barker, J.E. Parker, B.D. Esquivel, E.L. Berkow, S.R. Lockhart, L.  
311 Gade, G.E. Palmer, T.C. White, S.L. Kelly, C.A. Cuomo, P.D. Rogers, Mutations in TAC1B: a Novel  
312 Genetic Determinant of Clinical Fluconazole Resistance in *Candida auris*, *mBio* 11(3) (2020).
- 313 [12] S. Ahmad, Z. Khan, N. Al-Sweih, W. Alfouzan, L. Joseph, *Candida auris* in various hospitals  
314 across Kuwait and their susceptibility and molecular basis of resistance to antifungal drugs,  
315 *Mycoses* 63(1) (2020) 104-112.

- 316 [13] J.M. Rybak, C.M. Dickens, J.E. Parker, K.E. Caudle, K. Manigaba, S.G. Whaley, A.T.  
317 Nishimoto, A. Luna-Tapia, S. Roy, Q. Zhang, K.S. Barker, G.E. Palmer, T.R. Sutter, R. Homayouni,  
318 N.P. Wiederhold, S.L. Kelly, P.D. Rogers, Loss of C-5 Sterol Desaturase Activity Results in  
319 Increased Resistance to Azole and Echinocandin Antifungals in a Clinical Isolate of *Candida*  
320 *parapsilosis*, *Antimicrob Agents Chemother* 61(9) (2017).
- 321 [14] J.F. Munoz, L. Gade, N.A. Chow, V.N. Loparev, P. Juieng, E.L. Berkow, R.A. Farrer, A.P.  
322 Litvintseva, C.A. Cuomo, Genomic insights into multidrug-resistance, mating and virulence in  
323 *Candida auris* and related emerging species, *Nat Commun* 9(1) (2018) 5346.
- 324 [15] L. Lombardi, J. Oliveira-Pacheco, G. Butler, Plasmid-Based CRISPR-Cas9 Gene Editing in  
325 Multiple *Candida* Species, *mSphere* 4(2) (2019).
- 326 [16] L. Lombardi, J. Oliveira-Pacheco, G. Butler, Correction for Lombardi et al., "Plasmid-Based  
327 CRISPR-Cas9 Gene Editing in Multiple *Candida* Species", *mSphere* 5(3) (2020).
- 328 [17] S.L. Kelly, D.C. Lamb, D.E. Kelly, N.J. Manning, J. Loeffler, H. Hebart, U. Schumacher, H.  
329 Einsele, Resistance to fluconazole and cross-resistance to amphotericin B in *Candida albicans*  
330 from AIDS patients caused by defective sterol delta5,6-desaturation, *FEBS Lett* 400(1) (1997)  
331 80-2.
- 332 [18] S. Ahmad, L. Joseph, J.E. Parker, M. Asadzadeh, S.L. Kelly, J.F. Meis, Z. Khan, ERG6 and ERG2  
333 Are Major Targets Conferring Reduced Susceptibility to Amphotericin B in Clinical *Candida*  
334 *glabrata* Isolates in Kuwait, *Antimicrob Agents Chemother* 63(2) (2019).

335

336

337

338

339

340

341

342

343

344

345

346

347



348 **FIGURES**  
 349  
 350

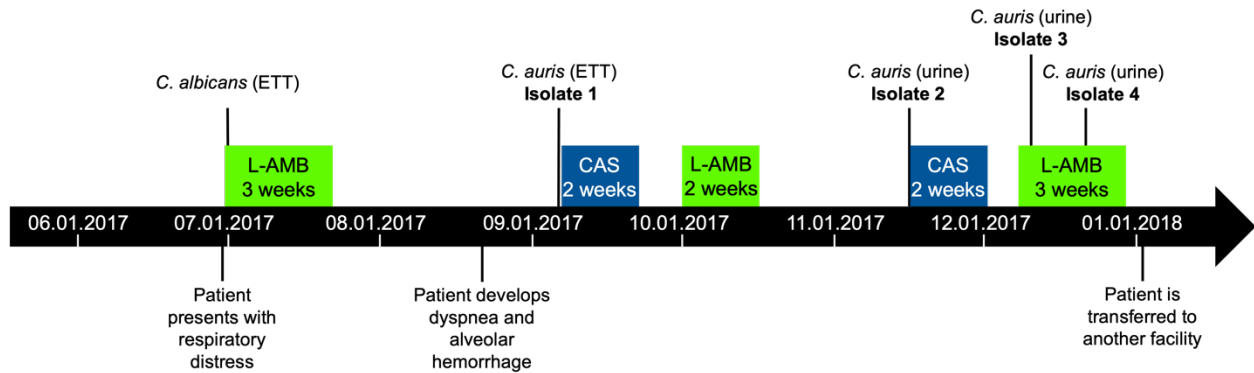

351  
 352  
 353  
 354 **Figure 1. High-level amphotericin B resistance develops during treatment of a *C. auris* invasive infection.** Timeline for the isolation of *Candida* clinical isolates and antifungal treatment administered to the patient. L-AMB: liposomal amphotericin B; CAS: caspofungin; ETT: endotracheal tube

358  
 359  
 360  
 361  
 362  
 363  
 364  
 365

| Gene ID      | Gene Name    | Mutation Type | Amino acid Substitution(s) | Gene Description                                                                                                                                                                                                                         | Isolate 1 | Isolate 2 | Isolate 3 | Isolate 4 |
|--------------|--------------|---------------|----------------------------|------------------------------------------------------------------------------------------------------------------------------------------------------------------------------------------------------------------------------------------|-----------|-----------|-----------|-----------|
| B9J08_005340 | <i>ERG6</i>  | Indel         | R97fs                      | Ortholog(s) have sterol 24-C-methyltransferase activity, role in ergosterol biosynthetic process and endoplasmic reticulum, lipid droplet localization                                                                                   |           | ■         | ■         | ■         |
| B9J08_005340 | <i>ERG6</i>  | Indel         | Y98fs                      | Ortholog(s) have sterol 24-C-methyltransferase activity, role in ergosterol biosynthetic process and endoplasmic reticulum, lipid droplet localization                                                                                   |           |           |           | ■         |
| B9J08_003401 | -            | SNP           | M1768K                     | Ortholog(s) have calcium channel activity, role in calcium ion import across plasma membrane, calcium ion transport, conidium formation, fungal-type cell wall organization, unidimensional cell growth and plasma membrane localization |           |           | ■         |           |
| B9J08_000964 | <i>FKS1</i>  | SNP           | D642Y                      | Putative 1,3-beta-D-glucan synthase                                                                                                                                                                                                      |           |           |           | ■         |
| B9J08_001448 | <i>ERG11</i> | SNP           | Y132F                      | Putative sterol 14-demethylase activity; mutations involved in fluconazole resistance                                                                                                                                                    | ■         | ■         | ■         | ■         |
| B9J08_004820 | <i>TAC1B</i> | SNP           | A583S                      | Has domain(s) with predicted DNA binding, DNA-binding transcription factor activity, RNA polymerase II-specific, zinc ion binding activity and role in regulation of transcription, DNA-templated, transcription, DNA-templated          | ■         | ■         | ■         | ■         |

366  
 367  
 368  
 369 **Figure 2. Whole genome sequencing reveals an association between mutations in *C. auris* *ERG6* and high-level amphotericin B resistance.** Non-synonymous mutations differing between *C. auris* clinical isolates in this study, and those previously associated with antifungal resistance are shown with gene identifier, gene name, mutation type, encoded amino acid substitution(s), and gene description (as listed on the *Candida* Genome Database). Boxes filled in blue indicate the presence of the listed mutation in the corresponding clinical isolate.

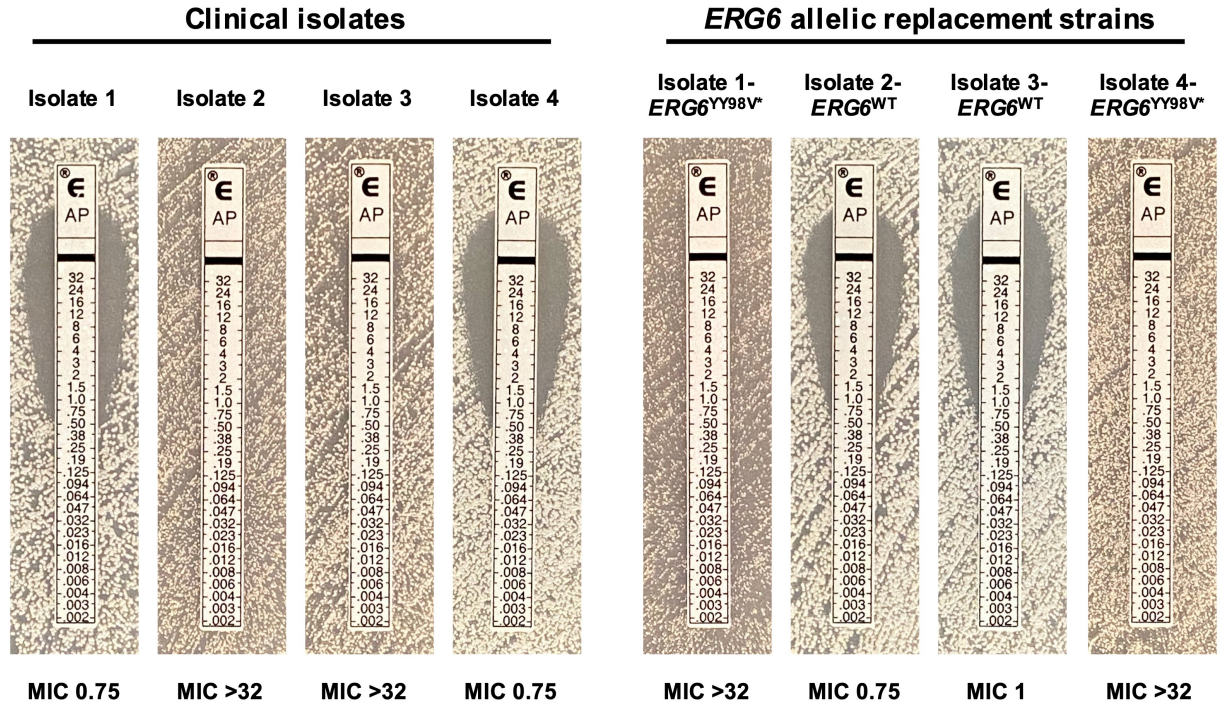

376  
377  
378  
379  
380  
381  
382  
383  
384  
385  
386  
387  
388  
389  
390  
391  
392

**Figure 3. Mutations in *C. auris* *ERG6* confer high-level amphotericin B resistance.** Amphotericin B MIC as determined by Etest for each of the clinical isolates and the *ERG6* allelic replacement strains constructed in these studies are shown.

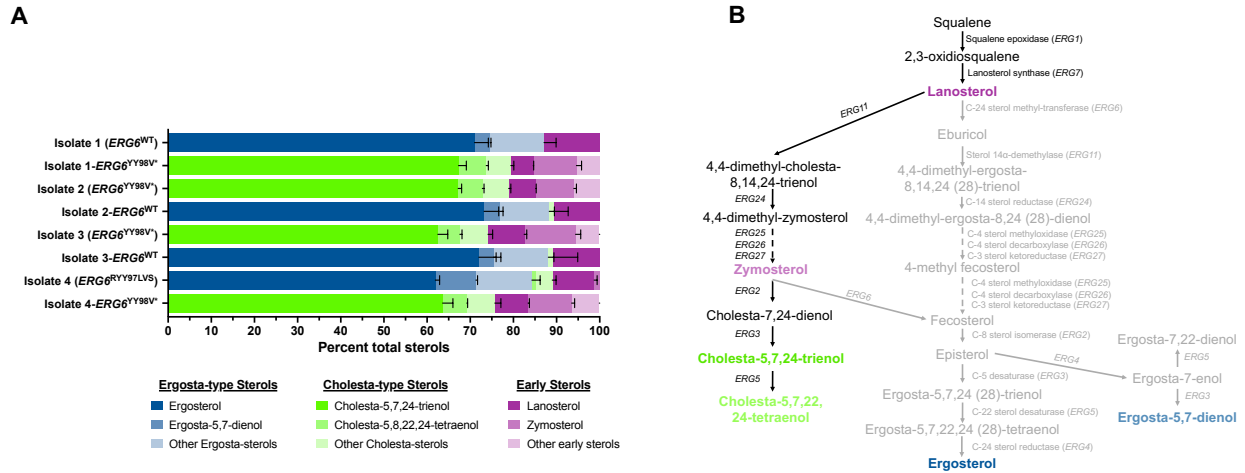

393  
394  
395  
396  
397  
398  
399  
400  
401  
402  
403  
404  
405

**Figure 4. Mutations in *C. auris* *ERG6* result in an abrogation of ergosterol biosynthesis and accumulation of cholesta-type sterols. A) Comprehensive sterol profiles of each of the clinical isolates and the *ERG6* allelic replacement strains constructed in these studies. Sterol profiles are shown with each sterol represented as the proportion of total cell sterols. Error bars represent the standard deviation from three independent biological samples. B) Putative *C. auris* sterol biosynthesis pathway demonstrating diversion of sterol production towards cholesta-type sterols upon loss of Erg6 activity. Sterols shown in green, blue, and purple correspond to cholesta-type, ergosta-type, and early sterols as shown in comprehensive sterol profiling.**

406 **TABLES**

407

408

409 **Table 1. Clinical antifungal susceptibilities for *C. auris* isolates.**

410

| Clinical Isolate | Clinical Antifungal MIC (mg/L) |             |             |
|------------------|--------------------------------|-------------|-------------|
|                  | Amphotericin B                 | Fluconazole | Caspofungin |
| Isolate 1        | 0.75                           | <b>256</b>  | 0.75        |
| Isolate 2        | <b>&gt;32</b>                  | <b>96</b>   | 0.38        |
| Isolate 3        | <b>&gt;32</b>                  | <b>96</b>   | 0.38        |
| Isolate 4        | 0.75                           | <b>256</b>  | <b>4</b>    |

MIC: minimum inhibitory concentration; MIC shown in **bold** exceed tentative CDC breakpoints

411

412

413
